# Supplementary material for: Drivers and Variability of Marine Heatwaves in the North Indian Ocean and their Impacts on South Asian Monsoon Rainfall
Source: Copernicus journal article supplement (doi:10.5194/egusphere-2025-3886), 2025-09-09
Supplement: Supplementary file 1 [file egusphere-2025-3886-supplement.pdf]

## S1 Partial correlation analysis

To isolate the relationship between the Dipole Mode Index (DMI) and the principal components (PC1 and PC2) of MHW intensity from the influence of ENSO, we computed the partial correlation controlling for Niño3.4. The partial correlation coefficient was calculated using the standard formula:

$$r_{xy \cdot z} = \frac{r_{xy} - r_{xz}r_{yz}}{\sqrt{(1 - r_{xz}^2)(1 - r_{yz}^2)}} \quad (\text{S1})$$

where  $r_{xy}$  is the Pearson correlation between DMI ( $x$ ) and PC ( $y$ ),  $r_{xz}$  between DMI and Niño3.4 ( $z$ ), and  $r_{yz}$  between PC and Niño3.4. This quantifies the direct association between DMI and PC after removing the linear influence of Niño3.4.

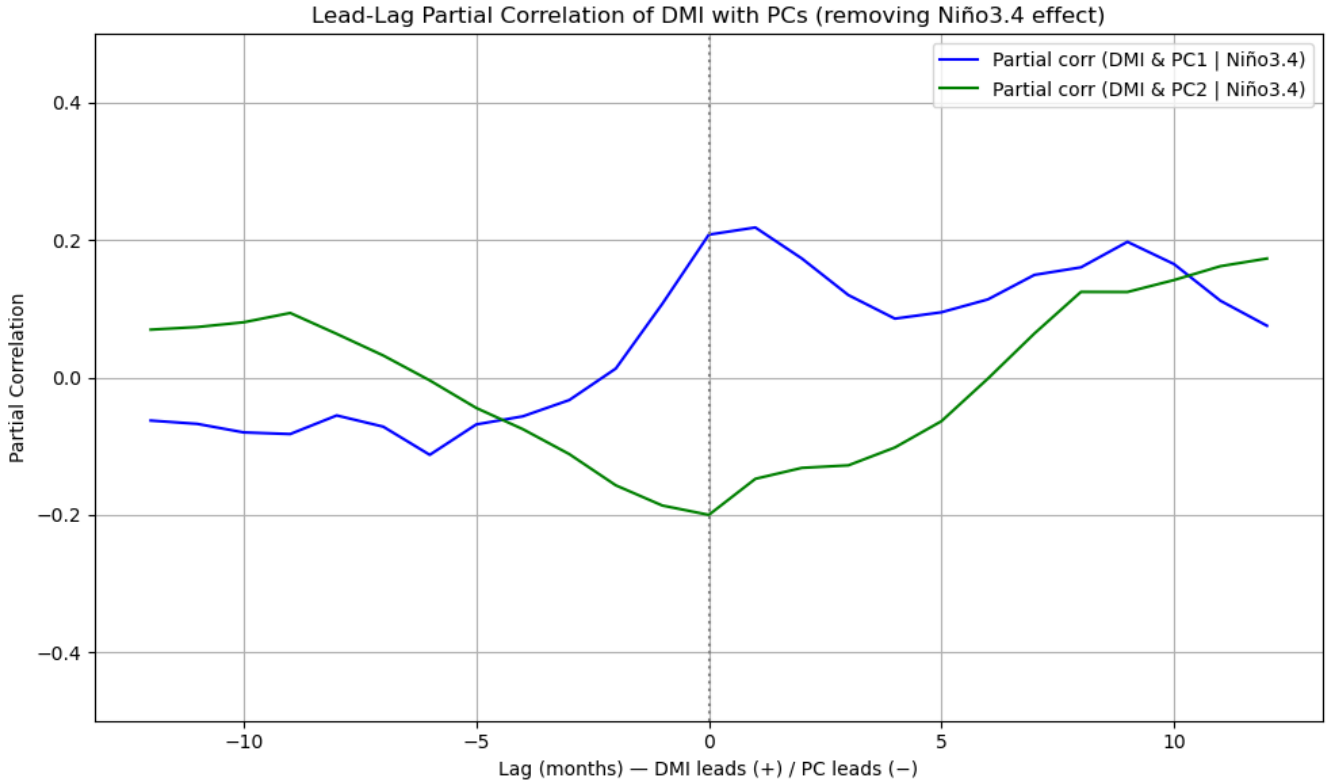

**Fig. S1.** Lead–lag partial correlation between the Dipole Mode Index (DMI) and the principal component time series (PC1 and PC2) of daily marine heatwave intensity in the North Indian Ocean, after removing the influence of Niño3.4 (ENSO).

**Table S1.** Extreme MHW Mode 1 Events During JJAS. Events were selected based on PC time series exceeding the seasonally varying 90th percentile for at least 5 consecutive days during the JJAS season.

| No. | Start Date  | End Date    | Duration (days) |
|-----|-------------|-------------|-----------------|
| 1   | 05-Jun-1982 | 10-Jun-1982 | 6               |
| 2   | 21-Sep-1982 | 26-Sep-1982 | 6               |
| 3   | 24-Jun-1983 | 21-Aug-1983 | 59              |
| 4   | 26-Aug-1983 | 03-Sep-1983 | 9               |
| 5   | 22-Jul-1987 | 21-Aug-1987 | 31              |
| 6   | 09-Jul-1988 | 14-Jul-1988 | 6               |
| 7   | 24-Jul-1988 | 01-Aug-1988 | 9               |
| 8   | 03-Jul-1993 | 07-Jul-1993 | 5               |
| 9   | 12-Sep-1997 | 23-Sep-1997 | 12              |
| 10  | 18-Jul-1998 | 08-Sep-1998 | 53              |
| 11  | 28-Aug-2005 | 06-Sep-2005 | 10              |
| 12  | 19-Jun-2006 | 24-Jun-2006 | 6               |
| 13  | 16-Jul-2010 | 20-Jul-2010 | 5               |
| 14  | 21-Aug-2015 | 19-Sep-2015 | 30              |
| 15  | 15-Aug-2023 | 15-Sep-2023 | 32              |
| 16  | 09-Jun-2024 | 29-Jun-2024 | 21              |

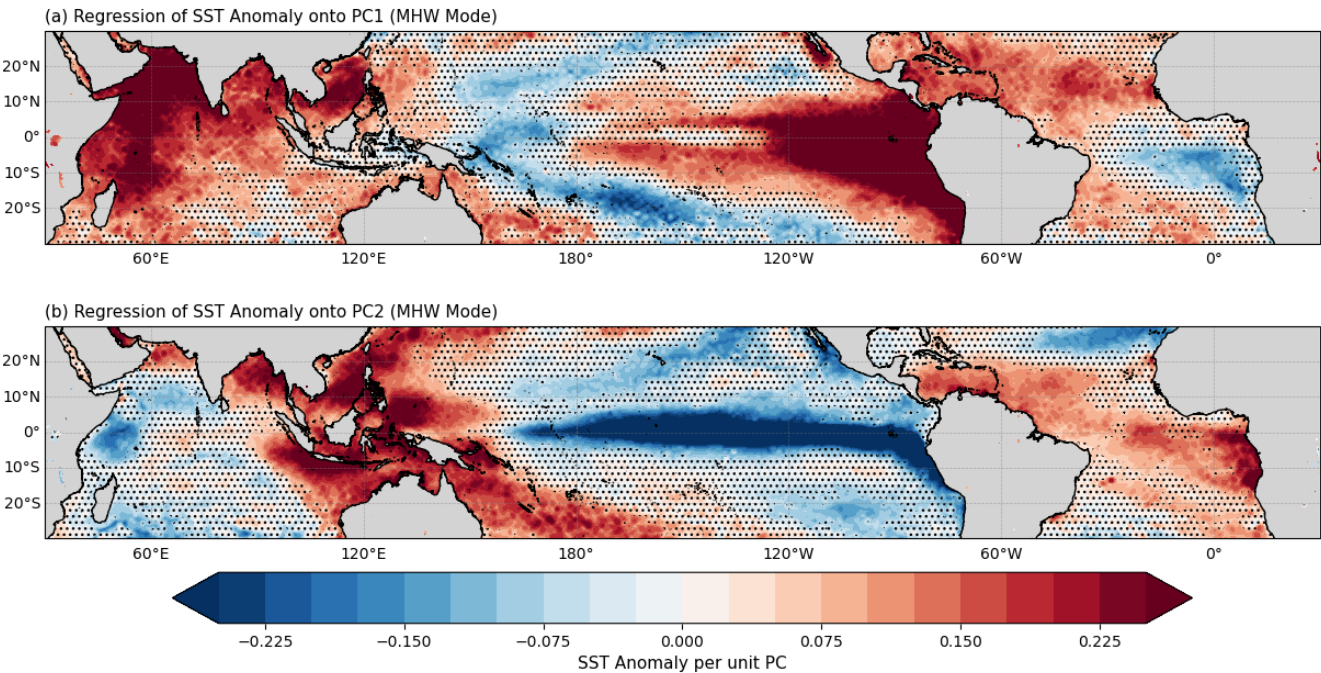

**Fig. S2.** Regression between SST and (a) PC1 time series and (b) PC2 time series.

**Table S2.** Extreme MHW Mode 2 Positive Events During JJAS. Events were selected based on PC 2 time series exceeding the seasonally varying 90th percentile for at least 5 consecutive days during the JJAS season.

| No. | Start Date  | End Date    | Duration (days) |
|-----|-------------|-------------|-----------------|
| 1   | 08-Aug-1982 | 12-Aug-1982 | 5               |
| 2   | 11-Jun-1983 | 23-Jun-1983 | 13              |
| 3   | 13-Sep-1983 | 29-Sep-1983 | 17              |
| 4   | 26-Jun-1987 | 07-Jul-1987 | 12              |
| 5   | 03-Aug-1988 | 22-Aug-1988 | 20              |
| 6   | 30-Aug-1988 | 20-Sep-1988 | 22              |
| 7   | 07-Jul-1991 | 17-Jul-1991 | 11              |
| 8   | 06-Jun-1992 | 15-Jun-1992 | 10              |
| 9   | 08-Jul-1993 | 13-Jul-1993 | 6               |
| 10  | 29-Jul-1993 | 03-Aug-1993 | 6               |
| 11  | 09-Aug-1993 | 15-Aug-1993 | 7               |
| 12  | 08-Jul-1996 | 15-Jul-1996 | 8               |
| 13  | 20-Jul-1996 | 24-Jul-1996 | 5               |
| 14  | 18-Aug-1996 | 23-Aug-1996 | 6               |
| 15  | 14-Jun-1998 | 07-Jul-1998 | 24              |
| 16  | 18-Sep-2001 | 23-Sep-2001 | 6               |
| 17  | 14-Jun-2002 | 22-Jun-2002 | 9               |
| 18  | 29-Jun-2002 | 23-Jul-2002 | 25              |
| 19  | 14-Jun-2005 | 23-Jun-2005 | 10              |
| 20  | 28-Jun-2005 | 04-Jul-2005 | 7               |
| 21  | 13-Jul-2005 | 24-Jul-2005 | 12              |
| 22  | 19-Jun-2007 | 24-Jun-2007 | 6               |
| 23  | 25-Jul-2007 | 02-Aug-2007 | 9               |
| 24  | 09-Jun-2010 | 15-Jun-2010 | 7               |
| 25  | 17-Aug-2010 | 30-Aug-2010 | 14              |
| 26  | 26-Aug-2016 | 30-Aug-2016 | 5               |
| 27  | 09-Sep-2017 | 15-Sep-2017 | 7               |
| 28  | 01-Jul-2020 | 09-Jul-2020 | 9               |
| 29  | 17-Jul-2020 | 17-Aug-2020 | 32              |
| 30  | 22-Aug-2020 | 25-Sep-2020 | 35              |
| 31  | 03-Jun-2021 | 07-Jun-2021 | 5               |
| 32  | 27-Jul-2022 | 07-Aug-2022 | 12              |
| 33  | 29-Aug-2022 | 08-Sep-2022 | 11              |
| 34  | 13-Aug-2024 | 22-Aug-2024 | 10              |

**Table S3.** Extreme MHW Mode 2 Negative Events During JJAS. Events were selected based on PC 2 time series falling below the seasonally varying 10th percentile for at least 5 consecutive days during the JJAS season.

| No. | Start Date  | End Date    | Duration (days) |
|-----|-------------|-------------|-----------------|
| 1   | 21-Jun-1982 | 28-Jul-1982 | 38              |
| 2   | 27-Aug-1982 | 31-Aug-1982 | 5               |
| 3   | 04-Jun-1983 | 08-Jun-1983 | 5               |
| 4   | 10-Sep-1987 | 25-Sep-1987 | 16              |
| 5   | 17-Jun-1988 | 21-Jun-1988 | 5               |
| 6   | 18-Aug-1990 | 22-Aug-1990 | 5               |
| 7   | 03-Jul-1992 | 14-Jul-1992 | 12              |
| 8   | 18-Jul-1992 | 22-Jul-1992 | 5               |
| 9   | 29-Jun-1995 | 04-Jul-1995 | 6               |
| 10  | 06-Jun-1997 | 03-Jul-1997 | 28              |
| 11  | 10-Jul-1997 | 22-Jul-1997 | 13              |
| 12  | 04-Jun-1998 | 10-Jun-1998 | 7               |
| 13  | 24-Aug-2006 | 11-Sep-2006 | 19              |
| 14  | 17-Jun-2009 | 02-Jul-2009 | 16              |
| 15  | 22-Sep-2009 | 27-Sep-2009 | 6               |
| 16  | 05-Aug-2011 | 19-Aug-2011 | 15              |
| 17  | 21-Jul-2012 | 25-Jul-2012 | 5               |
| 18  | 29-Jul-2012 | 14-Aug-2012 | 17              |
| 19  | 03-Sep-2013 | 08-Sep-2013 | 6               |
| 20  | 02-Aug-2015 | 07-Aug-2015 | 6               |
| 21  | 14-Sep-2018 | 19-Sep-2018 | 6               |
| 22  | 05-Jul-2024 | 13-Jul-2024 | 9               |

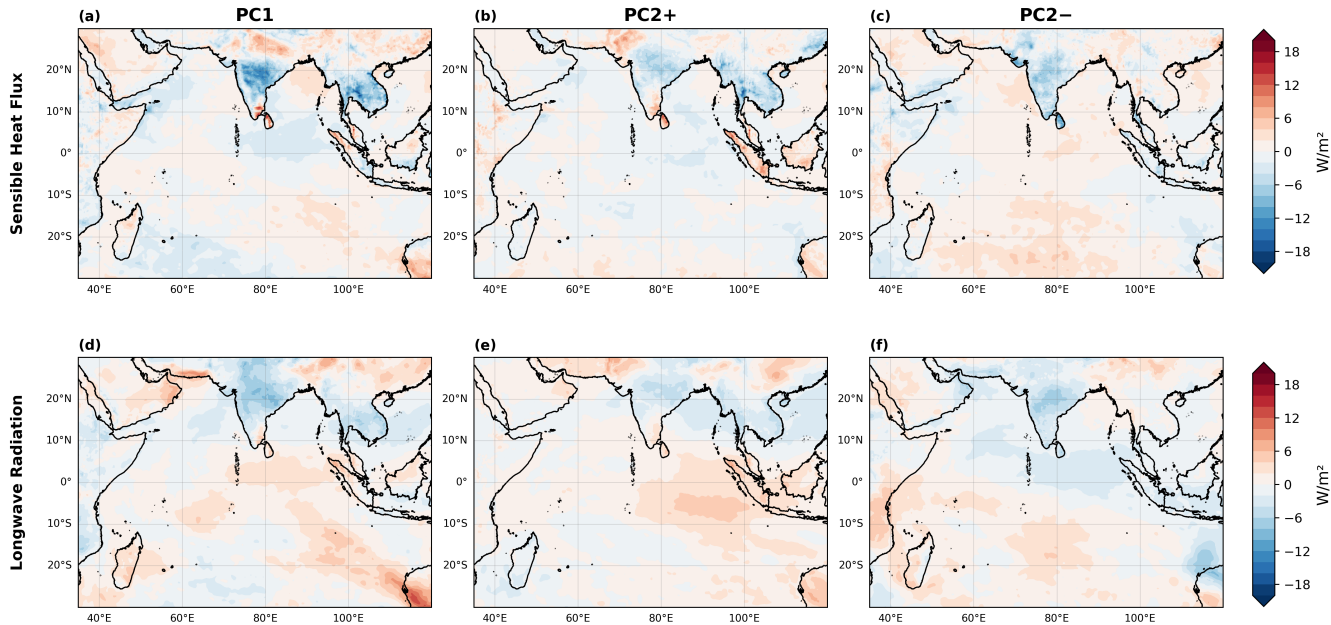

**Fig. S3.** Composite anomalies averaged over the 5 days preceding MHW onset for the PC1 mode (left), PC2-positive mode (middle), and PC2-negative mode (right). Rows show: (1) sensible heat flux anomaly ( $W/m^2$ ), (2) longwave radiation anomaly ( $W/m^2$ ).

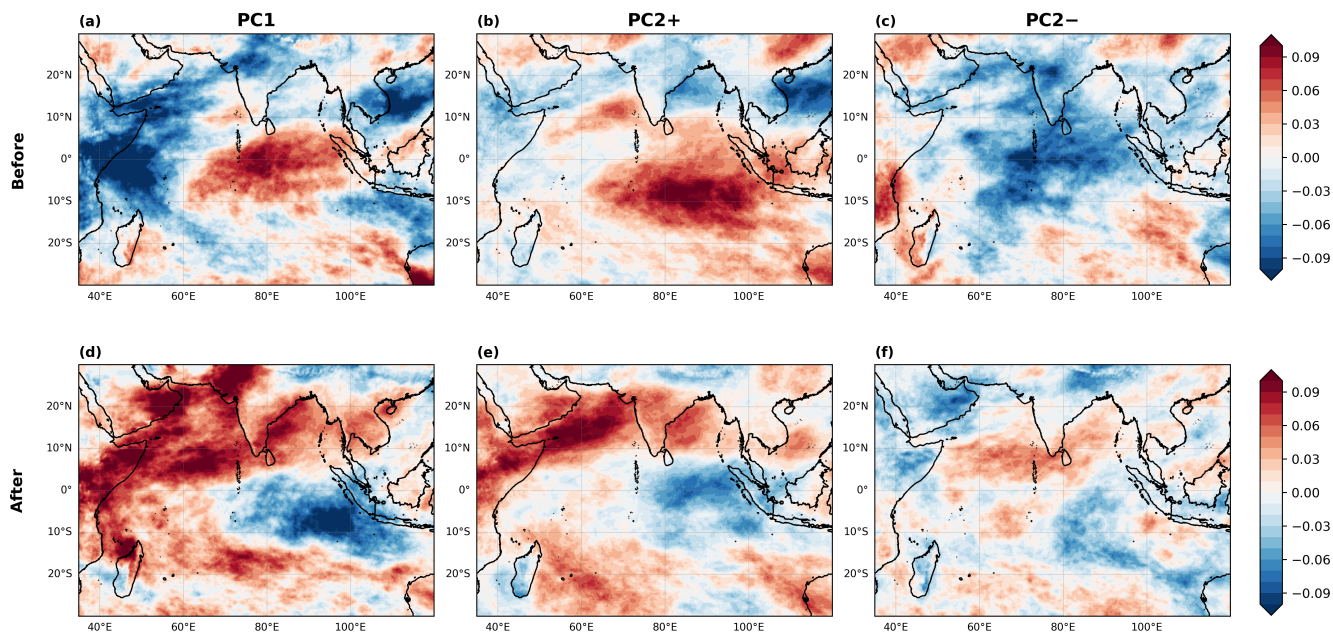

**Fig. S4.** Composite anomalies of total cloud cover (fraction) averaged over the 5 days preceding MHW onset (top) and 5 days after MHW termination (bottom) for the PC1 mode (left), PC2-positive mode (middle), and PC2-negative mode (right).

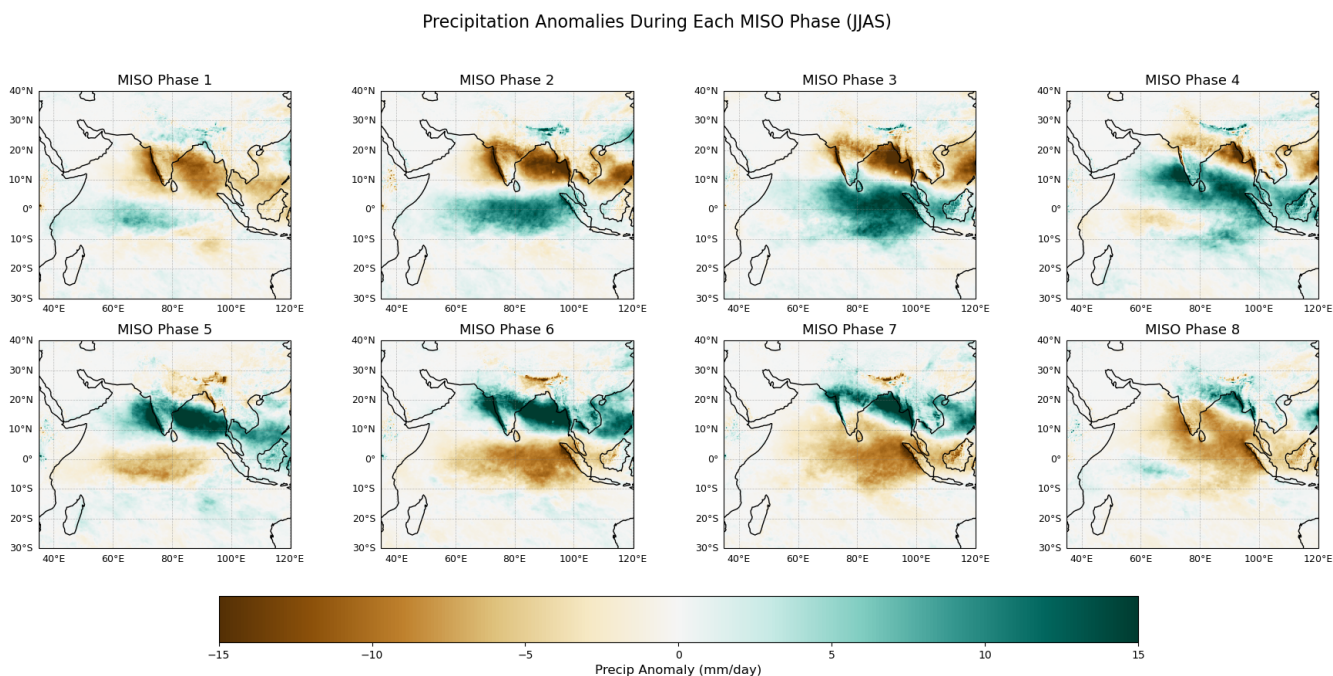

**Fig. S5.** Composite anomalies of precipitation during MISO phases.



Mean Sea Level Pressure (MSLP) Anomalies During Each MISO Phase (JJAS)

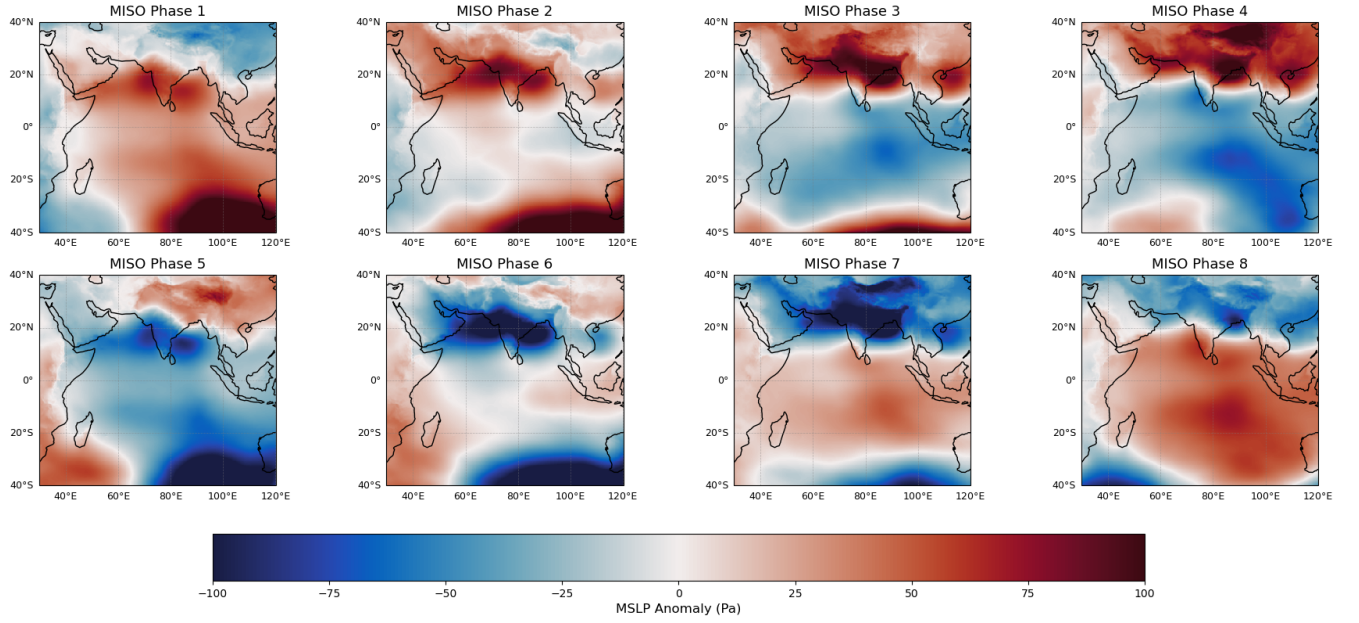

**Fig. S6.** Composite anomalies of mean sea level pressure during MISO phases.

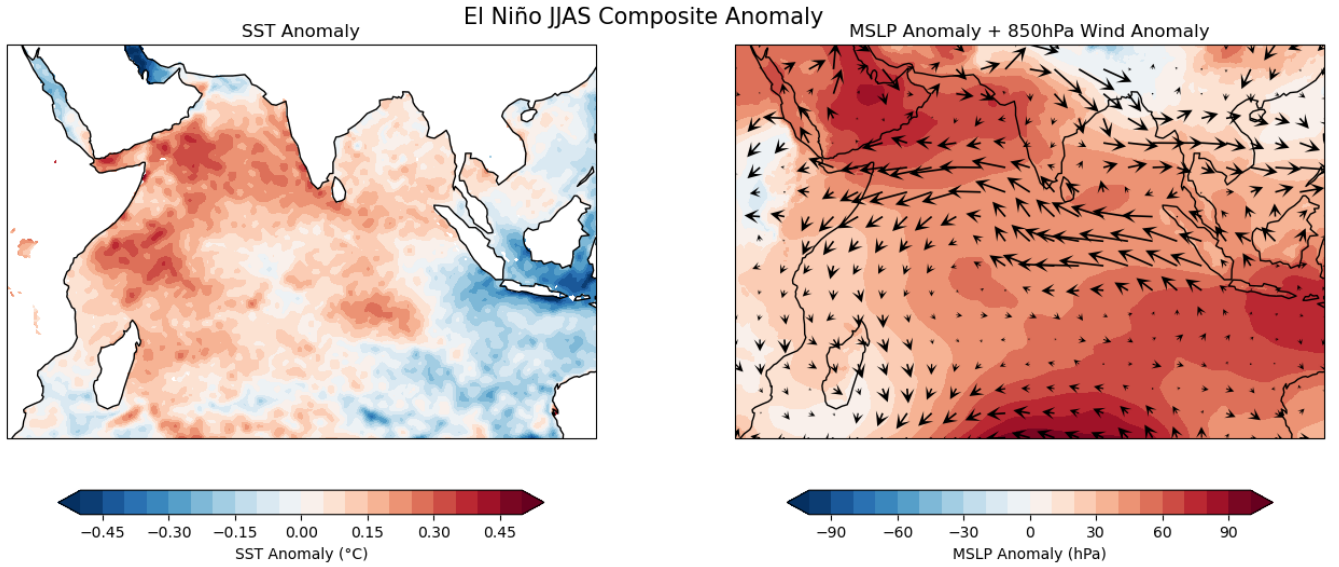

**Fig. S7.** Composite anomalies of SST, mean sea level pressure, and 850-hPa winds during El Niño years (JJAS).

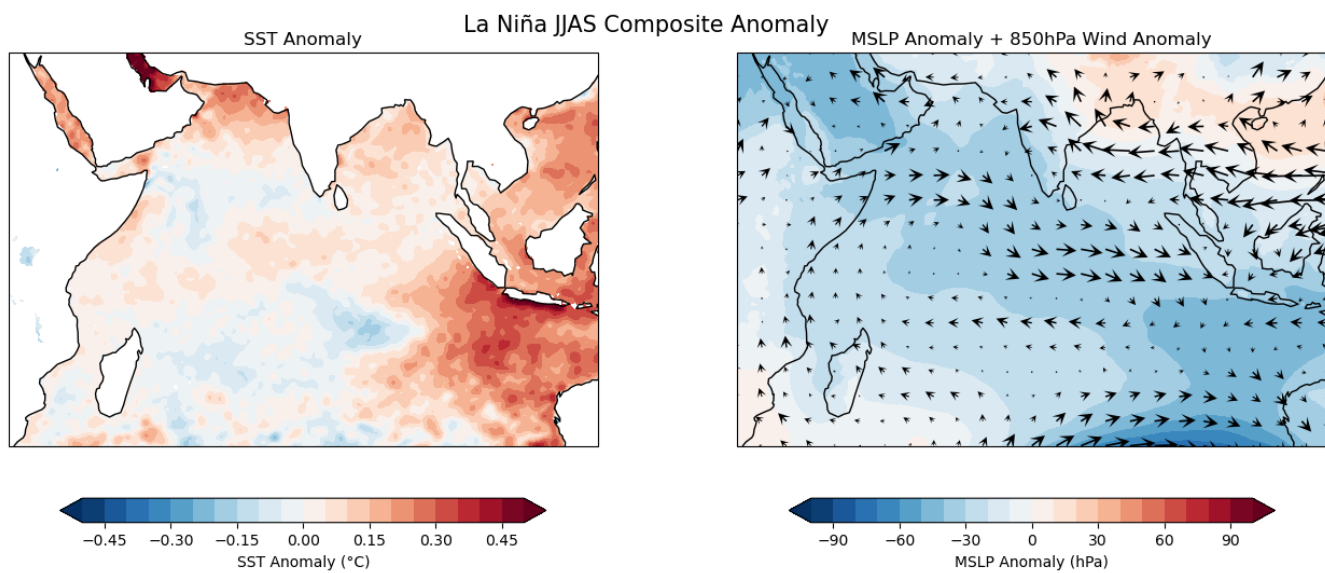

**Fig. S8.** Composite anomalies of SST, mean sea level pressure, and 850-hPa winds during La-Nina years (JJAS).

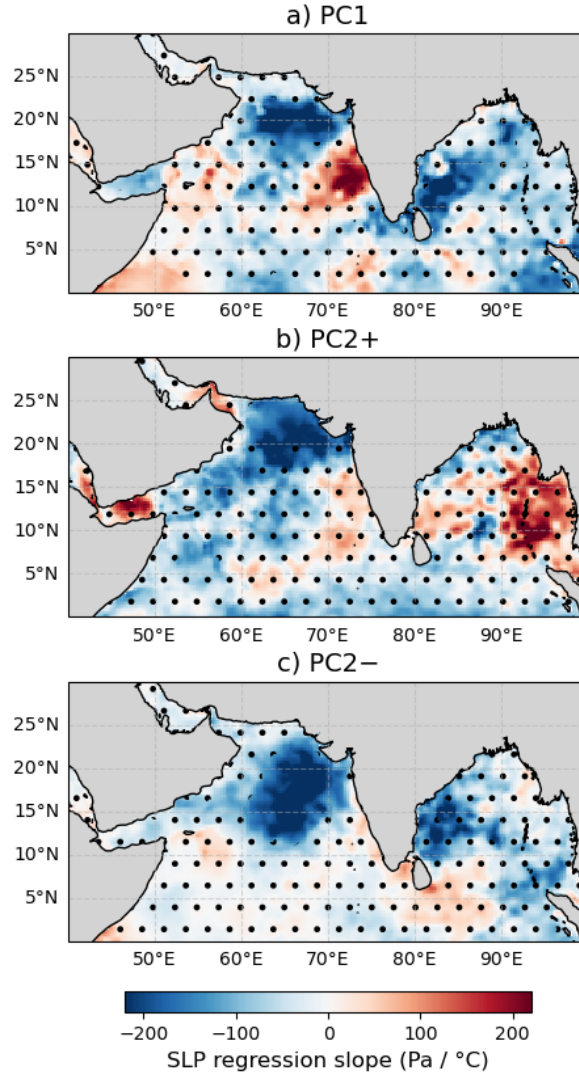

**Fig. S9.** Linear regression coefficients between SST and MSLP associated with the three different MHW modes: (a) PC1, (b) PC2+, and (c) PC2-. The regression is based on SST averaged over the 5 days preceding the end of each MHW event and MSLP averaged over the 5 days following the end of each MHW event. Hatching indicates regions where the regression is not statistically significant at the 90% confidence level.



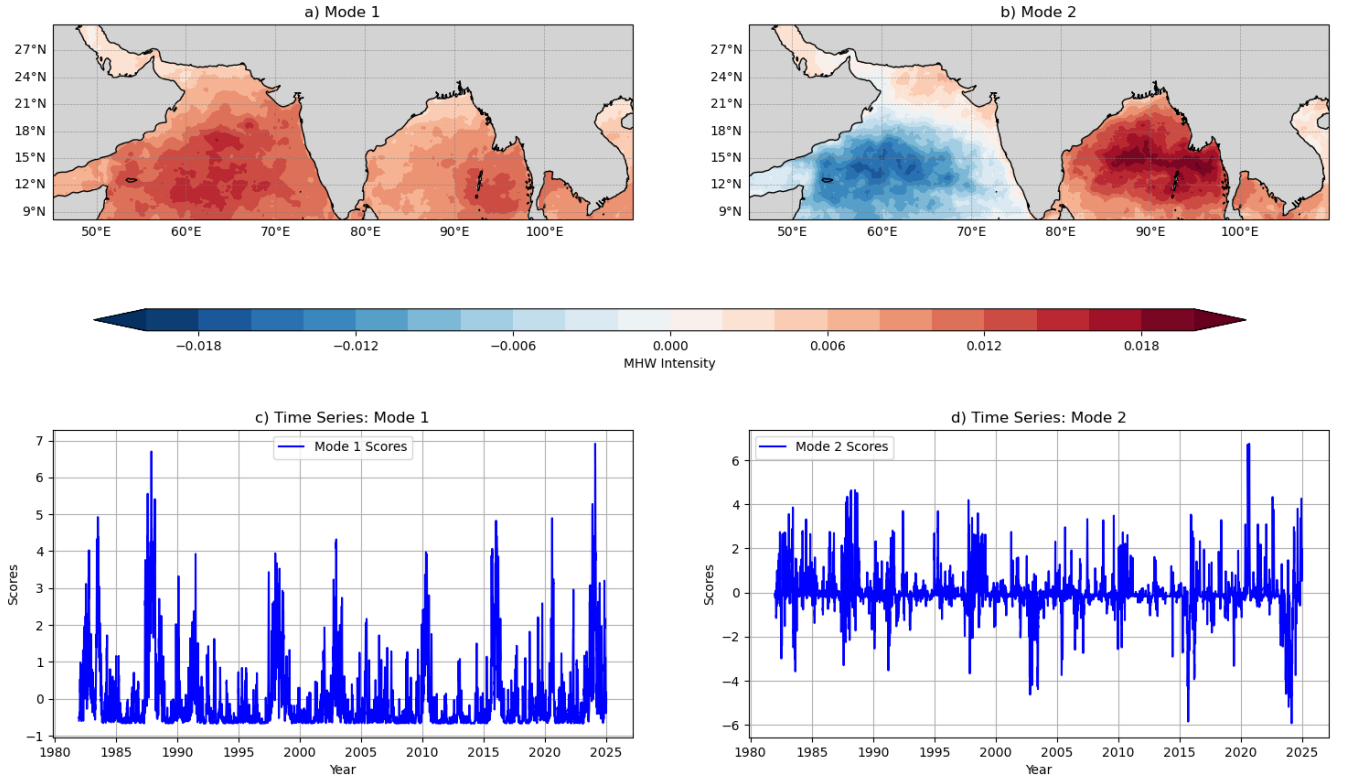

**Fig. S10.** Empirical Orthogonal Function (EOF) analysis of the MHW intensity in the North Indian Ocean using OISST SST. (a) Spatial pattern of the leading mode (Mode 1). (b) Spatial pattern of the second mode (Mode 2). (c) Normalized principal component time series corresponding to Mode 1. (d) Normalized principal component time series corresponding to Mode 2. Same as Figure 2 in the main text, but using SST from OISST.

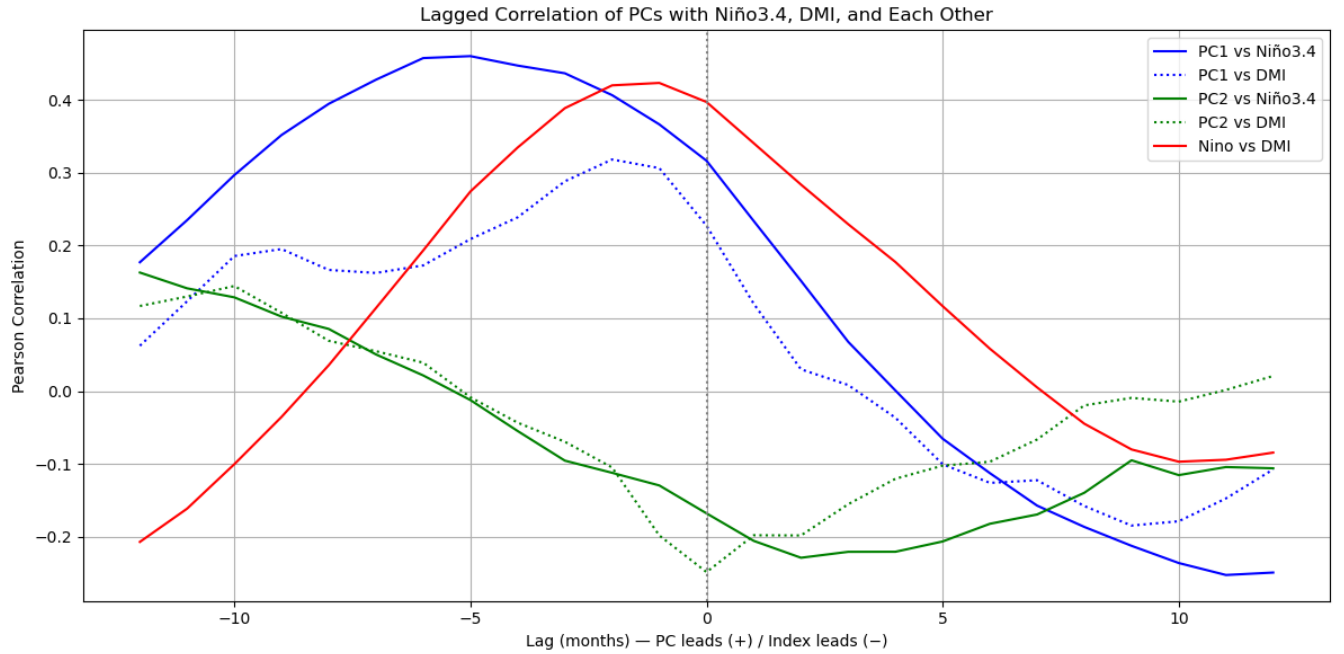

**Fig. S11.** Lead-lag correlations between the PCs (converted to monthly) and climate indices. Blue and green lines represent correlations involving PC1 and PC2, respectively. Solid lines denote correlations with Niño 3.4, while dashed lines denote correlations with the DMI. The red line shows the correlation between Niño 3.4 and DMI. Negative lags indicate the climate index leads the PC, while positive lags indicate the PC leads the index. Same as Figure 3 in the main text, but using SST from OISST.

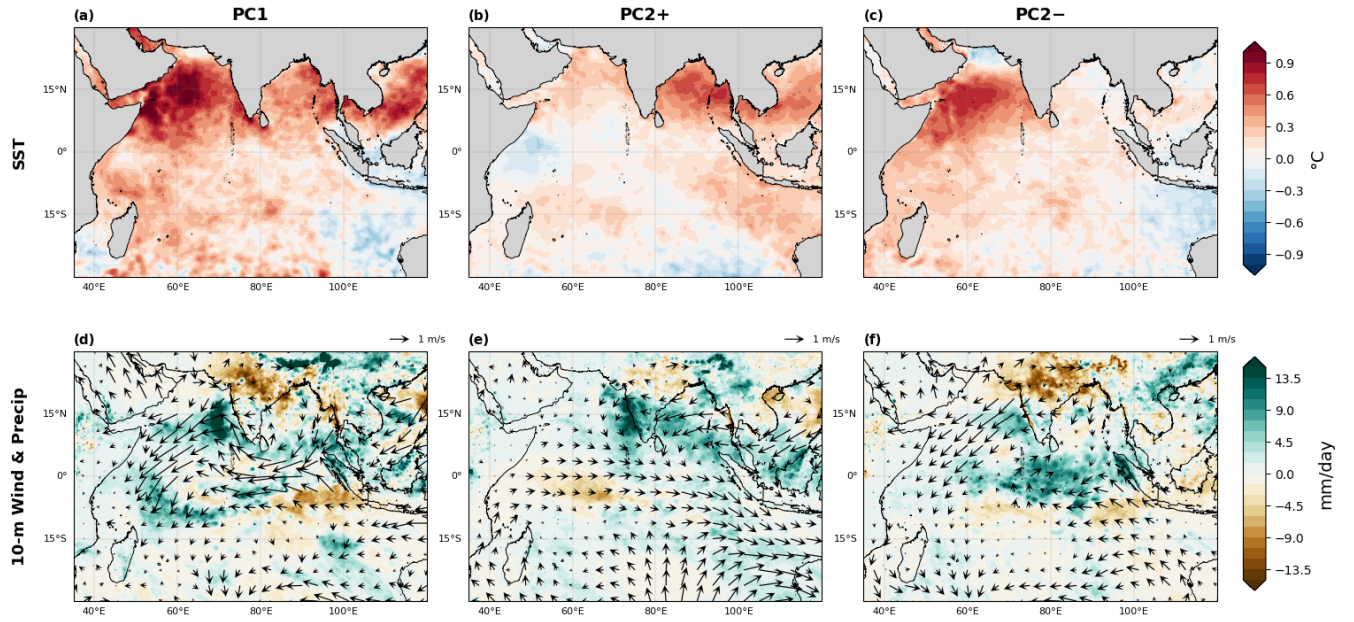

**Fig. S12.** Composite anomalies of (top row) SST (°C) and (bottom row) precipitation (shading; mm/day) and 10-meter wind vectors (arrows; m/s) during MHW events associated with PC1 (left), PC2+ (middle), and PC2- (right) phases. Same as Figure 4 in the main text, but using SST from OISST and selecting events based on PCs computed using OISST, following the same method as provided in the main text.
